# Supplementary material for: Qi Ling decreases paclitaxel resistance in the human prostate cancer by reversing tumor-associated macrophages function
Source: publisher site journal article supplement (doi:10.18632/aging.203904), 2022-02-22
Supplement: Supplementary file [file aging-v14i4-203904-supplementary-material-SD1.pdf]

## SUPPLEMENTARY FIGURE

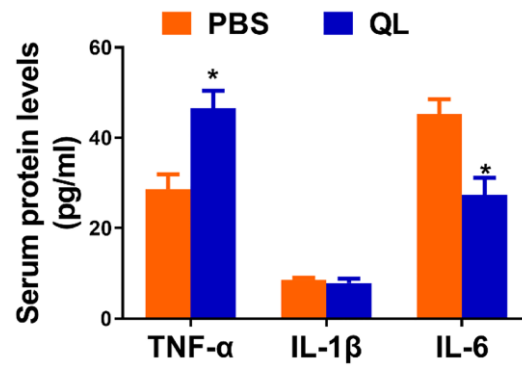

Supplementary Figure 1. TNF- $\alpha$ , IL-1 $\beta$  and IL-6 level in the serum of Qi Ling-treated and PBS-treated rats were measured by ELISA. \* $p < 0.05$ .
